# Supplementary material for: A practicable process for lignin color reduction: fractionation of lignin using methanol/water as a solvent
Source: Royal Society of Chemistry journal article supplement (doi:10.1039/c7gc01974b), 2017-01-01

## **Supplementary materials**

### **A practicable process for lignin color reduction: fractionation of lignin using methanol/water as solvent**

Hui Zhang, Youcan Bai, Boming Yu, Xinxin Liu and Fangeng Chen\*

State Key Laboratory of Pulp and Paper Engineering, South China University of Technology, Guangzhou 510640, Guangdong, China

\*Corresponding author, Tel.: +8613430364029; E-mail: huizhang5066@163.com

#### **List of Supplementary materials:**

Table S1 Molecular weight of lignin fractions fractionated by ethanol/water solution.

Fig. S1 Yield of lignin fractions fractionated by ethanol/water solution.

Table S1

| Ethanol ratio |             | Mw    | Mn    | Mw/Mn |
|---------------|-------------|-------|-------|-------|
| 95%           | dissolved   | 2955  | 1522  | 1.94  |
|               | undissolved | 27333 | 13205 | 2.07  |
| 75%           | dissolved   | 6428  | 2738  | 2.35  |
|               | undissolved | 38689 | 15987 | 2.42  |
| 50%           | dissolved   | 3228  | 2517  | 1.28  |
|               | undissolved | 30198 | 7296  | 4.14  |

Fig. S1

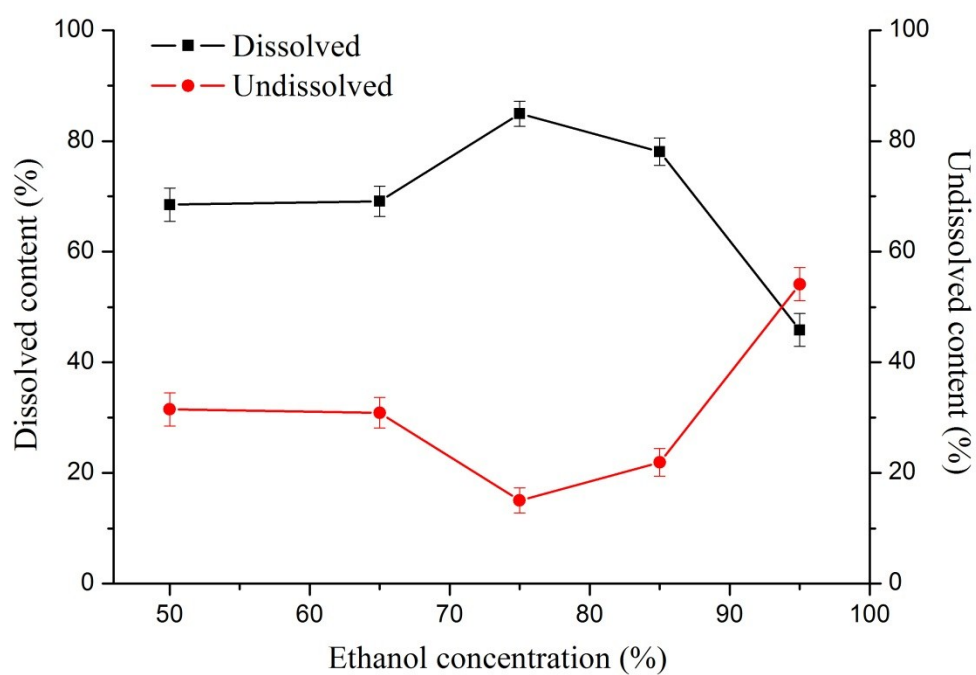

Supplement: c7gc01974b1.pdf [file c7gc01974b1.pdf]
